# Supplementary material
Source: PubMed Central journal article supplement (PMC7784702)
Supplement: 41396_2020_725_MOESM4_ESM.pdf [file 41396_2020_725_MOESM4_ESM.pdf]

# Photograph log of key enrichment cultures

## Media controls:

Left: Pfennig's medium (S2-)

Right: Freshwater medium from Hegler and colleagues, 2008 (Fe<sup>2+</sup>)

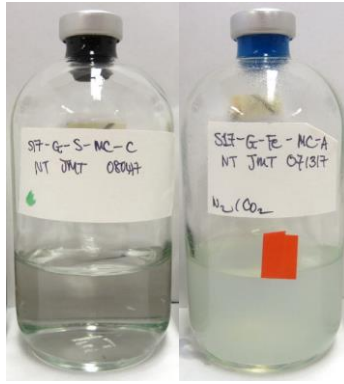

Reference culture of *Chl. ferrooxidans* KoFox grown on Hegler medium

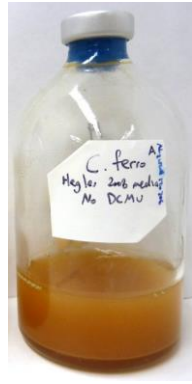

## L304 enrichment S-6D

Inoculated Aug. 8<sup>th</sup>, 2017

Subcultured Nov. 23<sup>rd</sup>, 2017 (~3.5 months later)

Typical growth time of ~3 weeks

Cells ~0.8-1 x 1.2-1.5 μm in size

Named "Ca. *Chl. canadense* L304-6D"

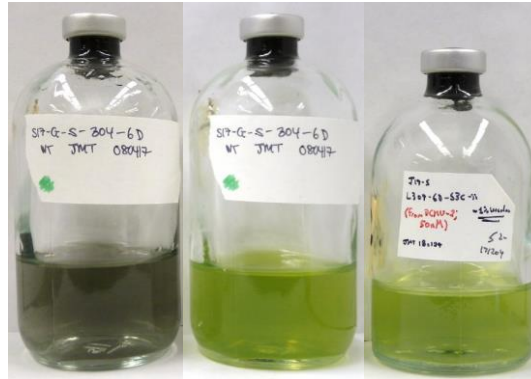

Aug. 24<sup>th</sup>, 2017

Nov. 23<sup>rd</sup>, 2017

Healthy subculture

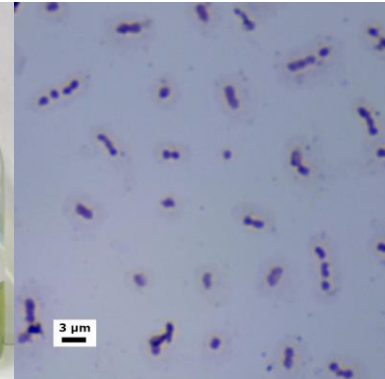

Simple stain (dry mount); bright field microscopy

## L227 enrichment S-6D

Dates of initial inoculation and subculture same as above

Typical growth time of ~4-8 weeks (slower growing)

Cells ~0.7-0.9 x 1-1.5 μm in size

Strain was lost in May 2018

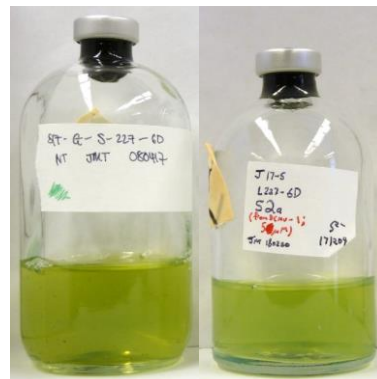

Nov. 23<sup>rd</sup>, 2017

Healthy subculture

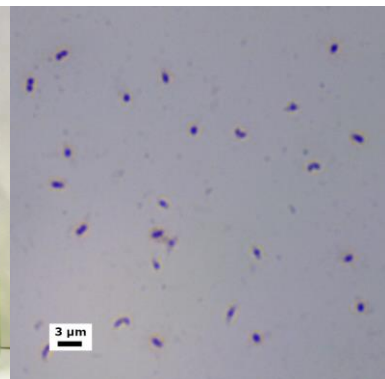

Simple stain (dry mount); bright field microscopy

## L227 enrichment Fe-6E

Inoculated into Hegler medium (Fe<sup>2+</sup>) on Aug. 8<sup>th</sup>, 2017

Developed greenish-black colouration

Eventually transitioned to sulfide-containing medium (Pfennig's), although growth was poor; *dsrA* sequence confirmed identical to L227-S-6D above

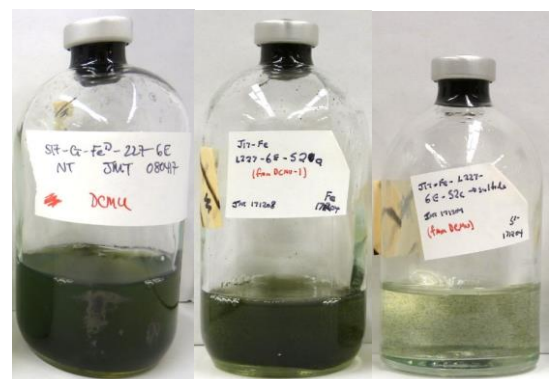

Oct. 19<sup>th</sup>, 2017

Subculture, Hegler

Subculture, Pfennig
