# Supplementary material
Source: PubMed Central journal article supplement (PMC7784702)
Supplement: 41396_2020_725_MOESM7_ESM.pdf [file 41396_2020_725_MOESM7_ESM.pdf]

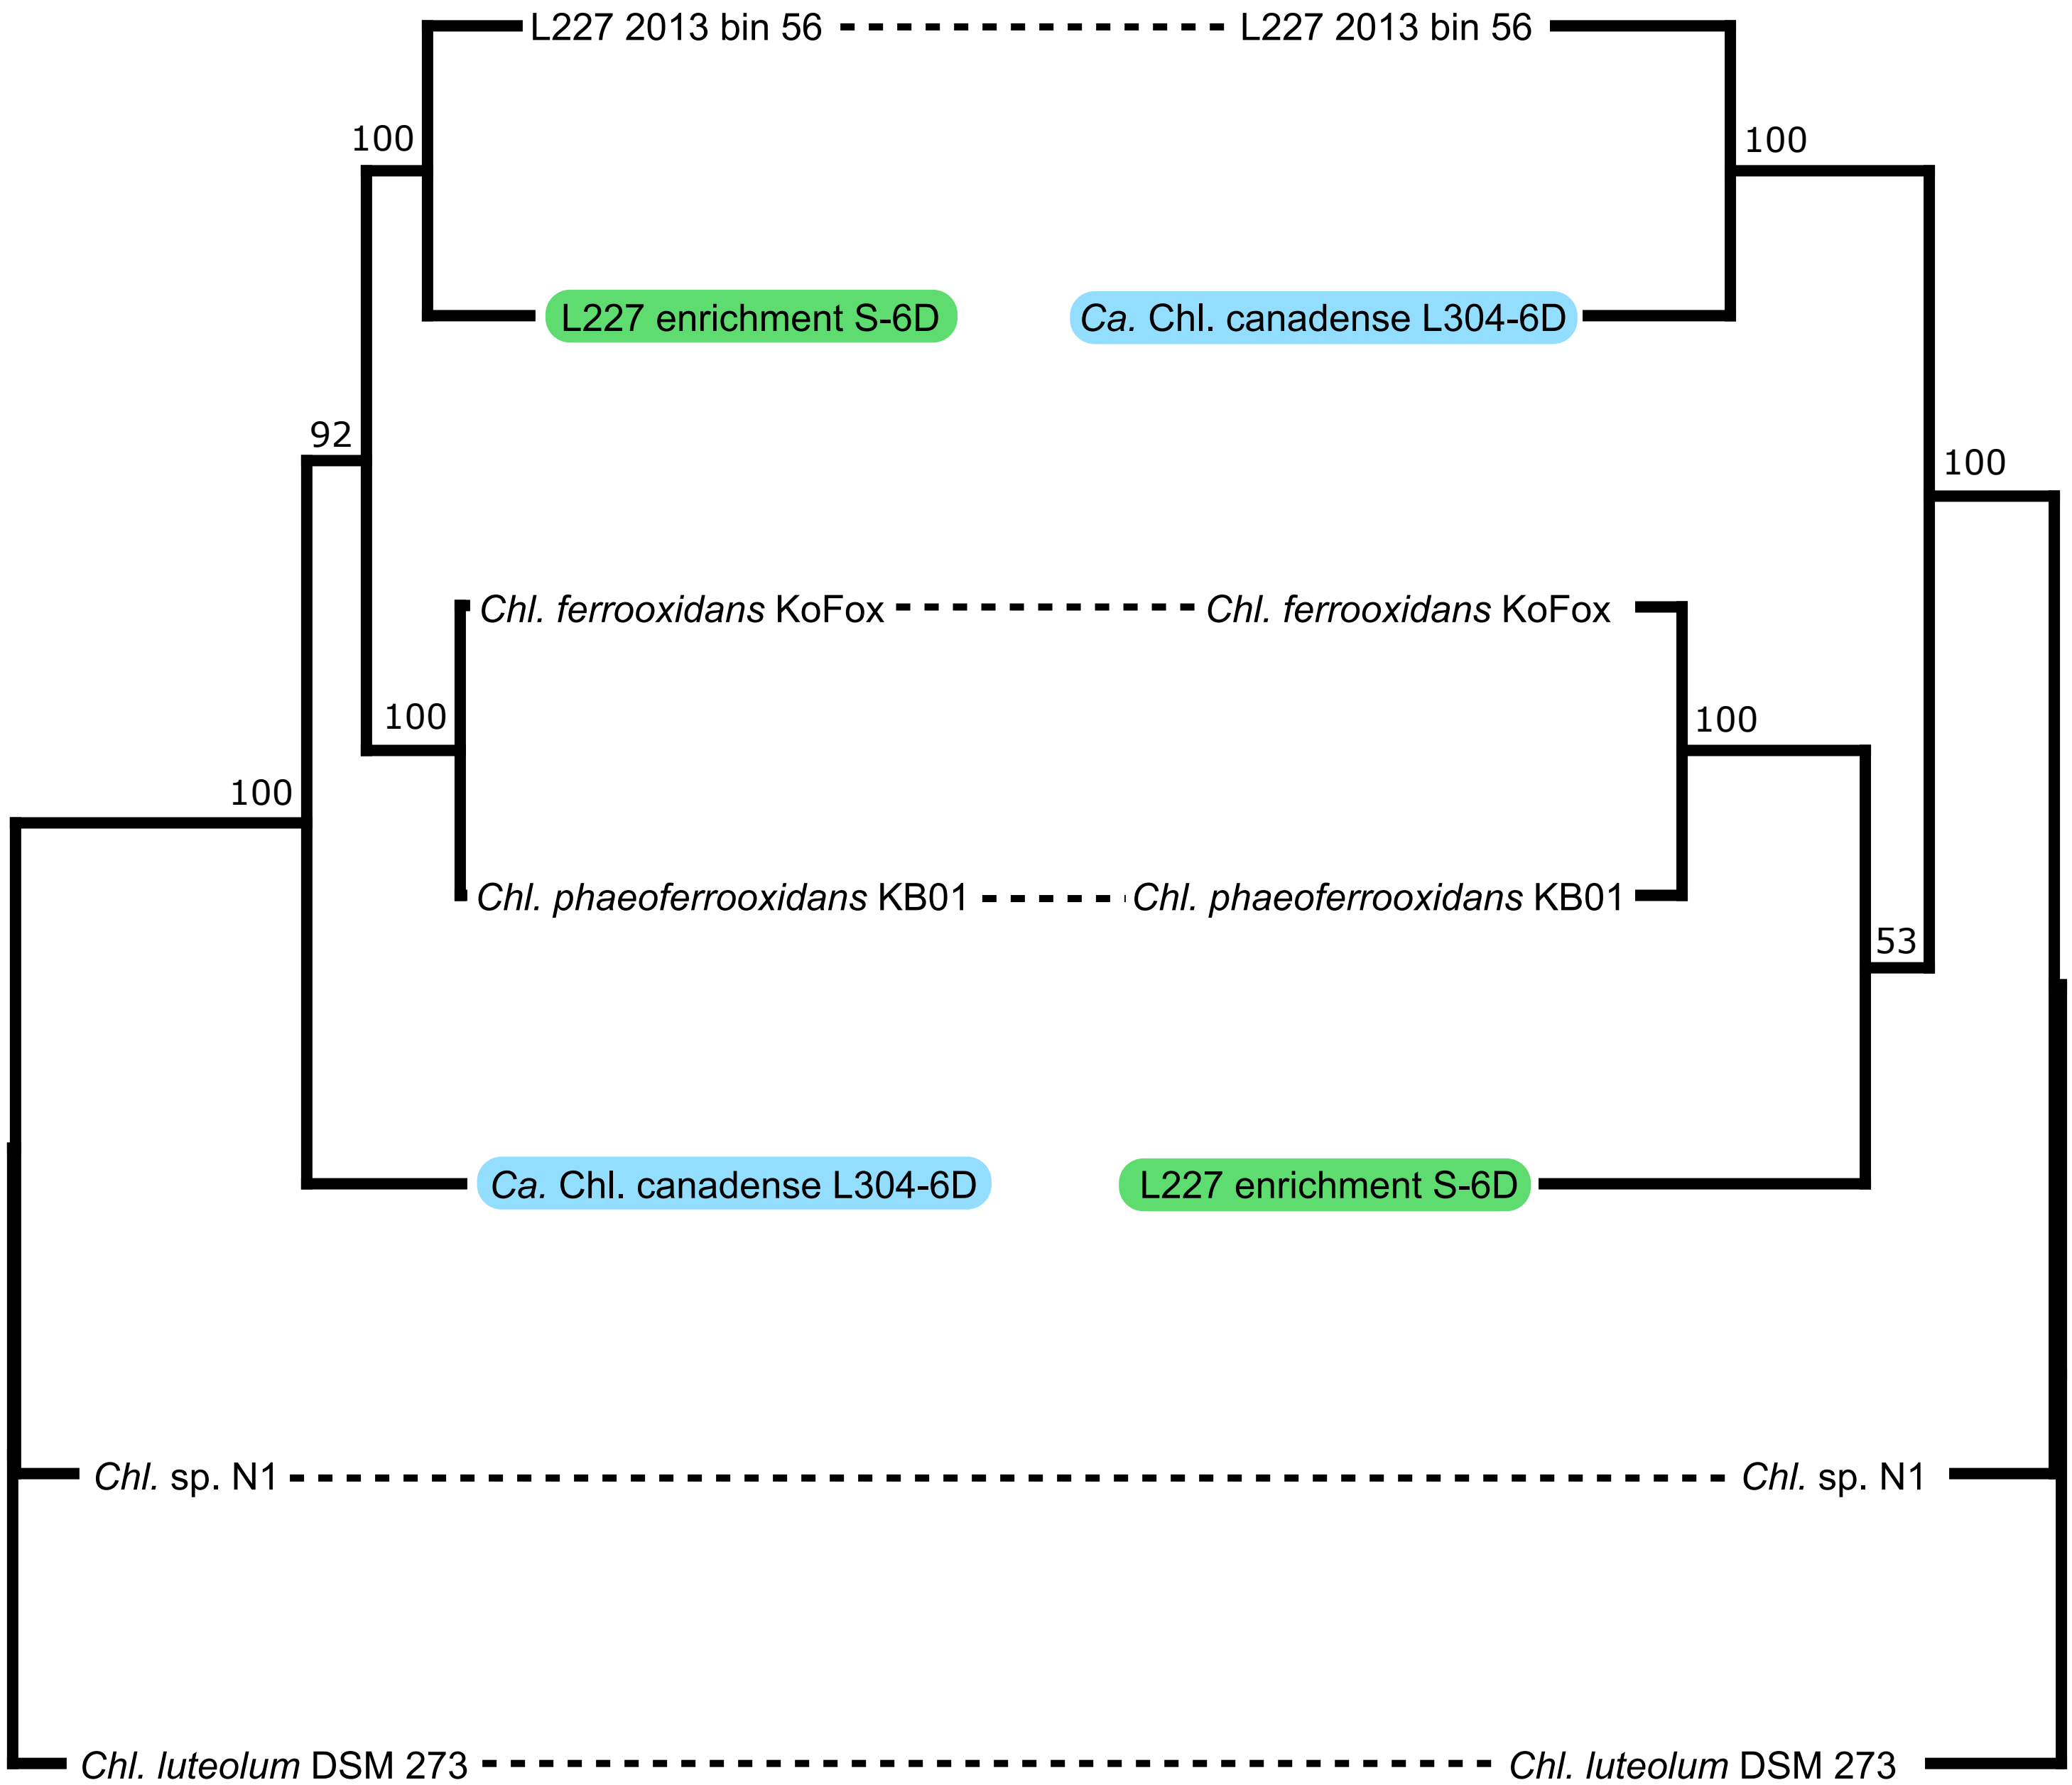

rp1 0.05

Cyc2 0.1
