# Supplementary material
Source: PubMed Central journal article supplement (PMC7784702)
Supplement: 41396_2020_725_MOESM8_ESM.pdf [file 41396_2020_725_MOESM8_ESM.pdf]

Family of closest homologue

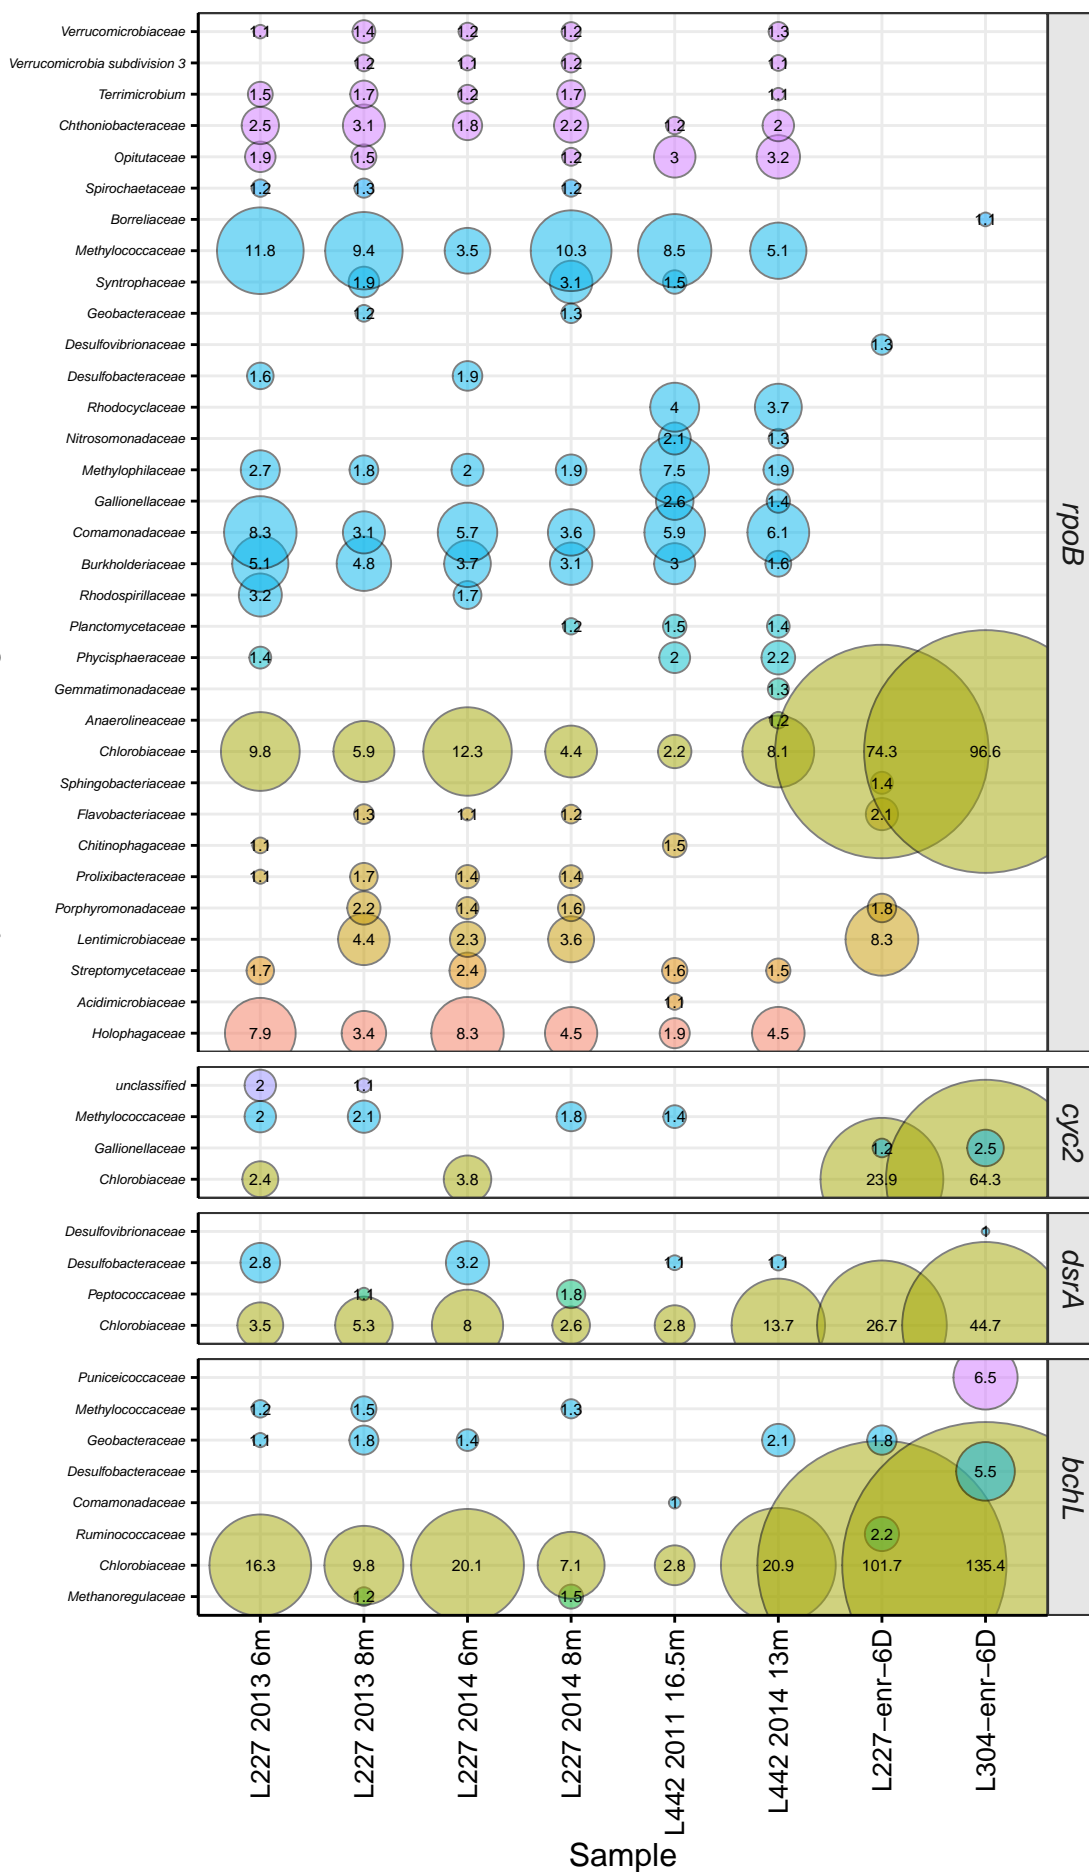

rpob

cyc2

dsrA

bchl

Sample
