# Supplementary material
Source: PubMed Central journal article supplement (PMC7784702)

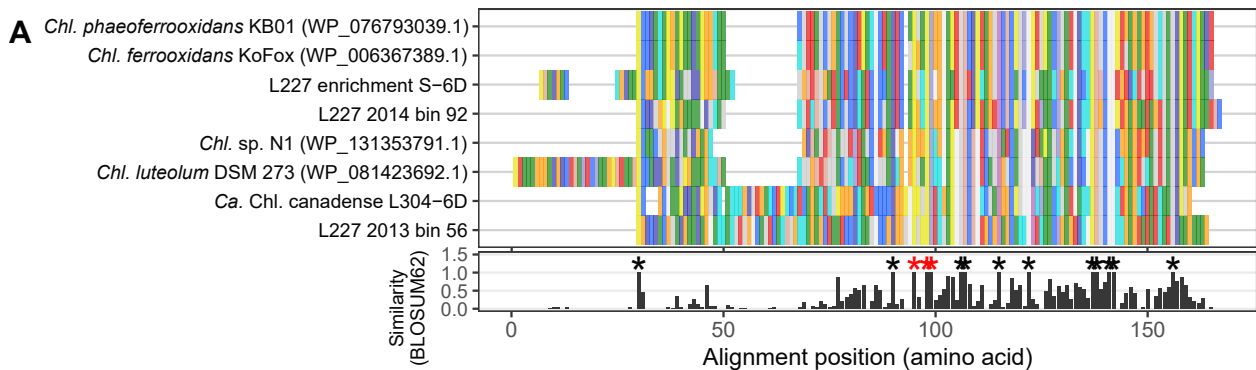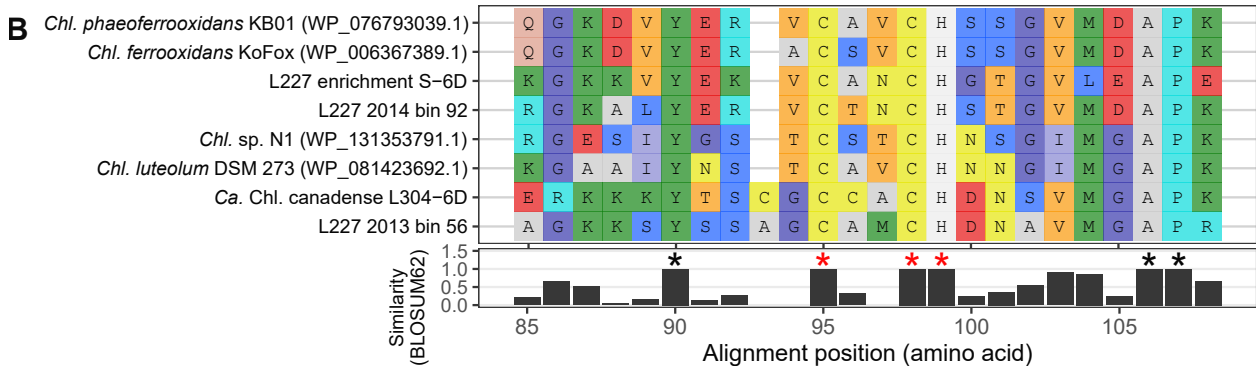

Supplement: 41396_2020_725_MOESM3_ESM.pdf [file 41396_2020_725_MOESM3_ESM.pdf]
